# Supplementary material for: Highly potent, naturally acquired human monoclonal antibodies against Pfs48/45 block Plasmodium falciparum transmission to mosquitoes
Source: PubMed Central journal article supplement (PMC9942873; doi:10.1016/j.immuni.2023.01.009), 2023-02-14
Supplement: mmc1.pdf [file mmc1.pdf]

**Supplemental information**

**Highly potent, naturally acquired human  
monoclonal antibodies against Pfs48/45 block**

***Plasmodium falciparum* transmission to mosquitoes**

**Amanda Fabra-García, Sophia Hailemariam, Roos M. de Jong, Kirsten Janssen, Karina Teelen, Marga van de Vegte-Bolmer, Geert-Jan van Gemert, Danton Ivanochko, Anthony Semesi, Brandon McLeod, Martijn W. Vos, Marloes H.C. de Bruijni, Judith M. Bolscher, Marta Szabat, Stefanie Vogt, Lucas Kraft, Sherie Duncan, Moses R. Kanya, Margaret E. Feeney, Prasanna Jagannathan, Bryan Greenhouse, Koen J. Dechering, Robert W. Sauerwein, C. Richter King, Randall S. MacGill, Teun Bousema, Jean-Philippe Julien, and Matthijs M. Jore**

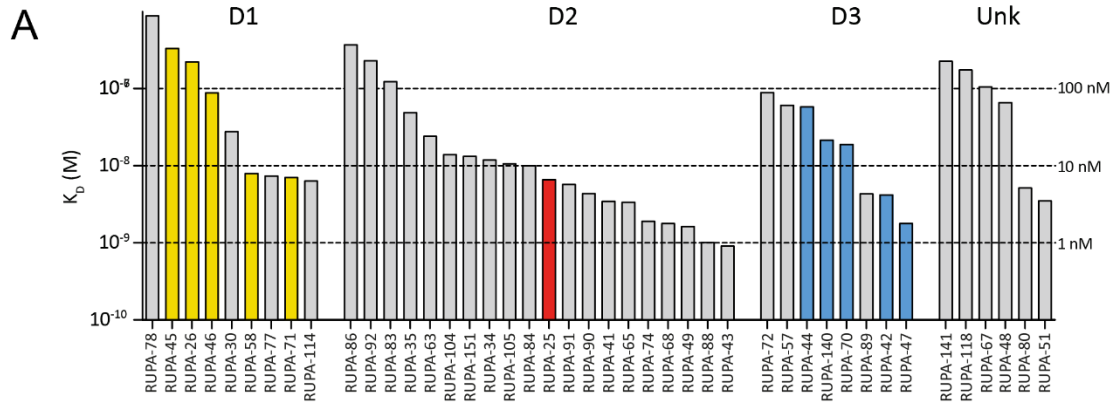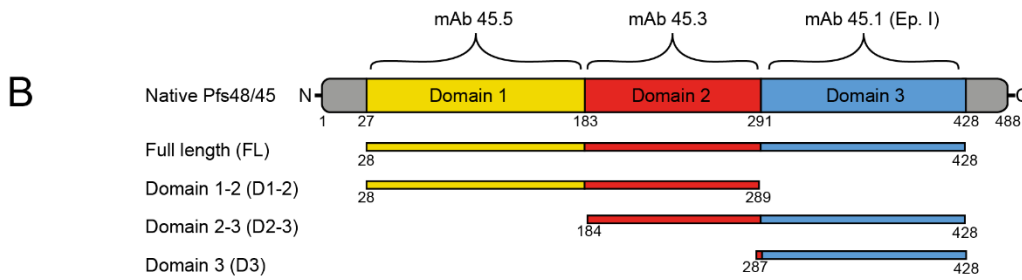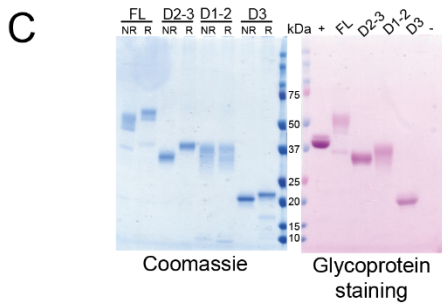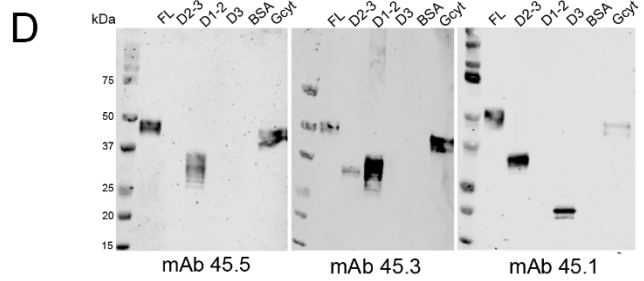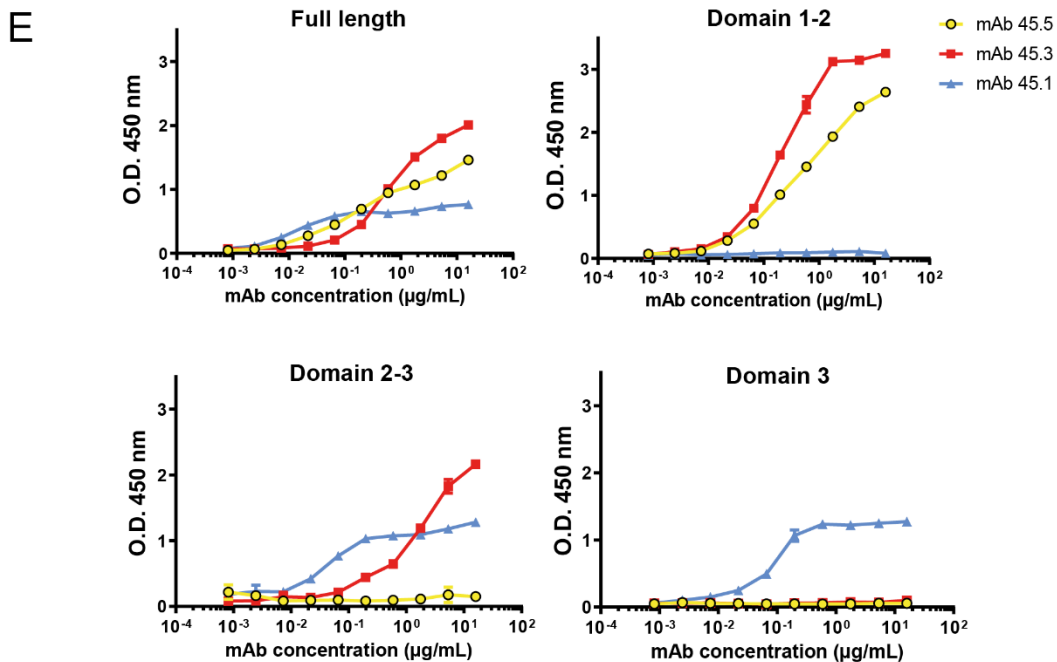

**Figure S1. Binding of mAbs to recombinant Pfs48/45.** (a) Binding affinity ( $K_D$ ) of mAbs for Pfs48/45. Affinity was determined by surface plasmon resonance (SPR) with immobilized antibodies and full-length Pfs48/45 as analyte. mAbs are grouped according to domain specificity. Colored bars represent mAbs with >80% TRA at 100  $\mu\text{g/ml}$ . (b-e) Expression and validation of recombinant Pfs48/45 fragments. (b) Schematic overview of Pfs48/45 fragments produced in *Drosophila melanogaster* S2 cells, including amino acid numbers. Rodent antibodies 85RF45.5, 85RF45.3 and 85RF45.1 recognize D1, D2 and D3, respectively<sup>1</sup>. mAbs 85RF45.3 and 85RF45.1 recognize conformational epitopes, 85RF45.5 recognizes a linear epitope<sup>1</sup>. Ep. I, Epitope I. (c) Purified proteins were separated on a 4-20% Bis-Tris polyacrylamide gel under non-reducing (NR) and reducing (R) conditions and were visualized with coomassie staining (left) or Pierce<sup>®</sup> glycoprotein staining (right). (+) and (-) are positive and negative glycosylation controls, respectively. The presence of (conformational) epitopes in recombinant fragments was confirmed by western blot (d) and ELISA (e). Gcyt, gametocyte extract. BSA, bovine serum albumin. **Related to Figure 1.**

**A**

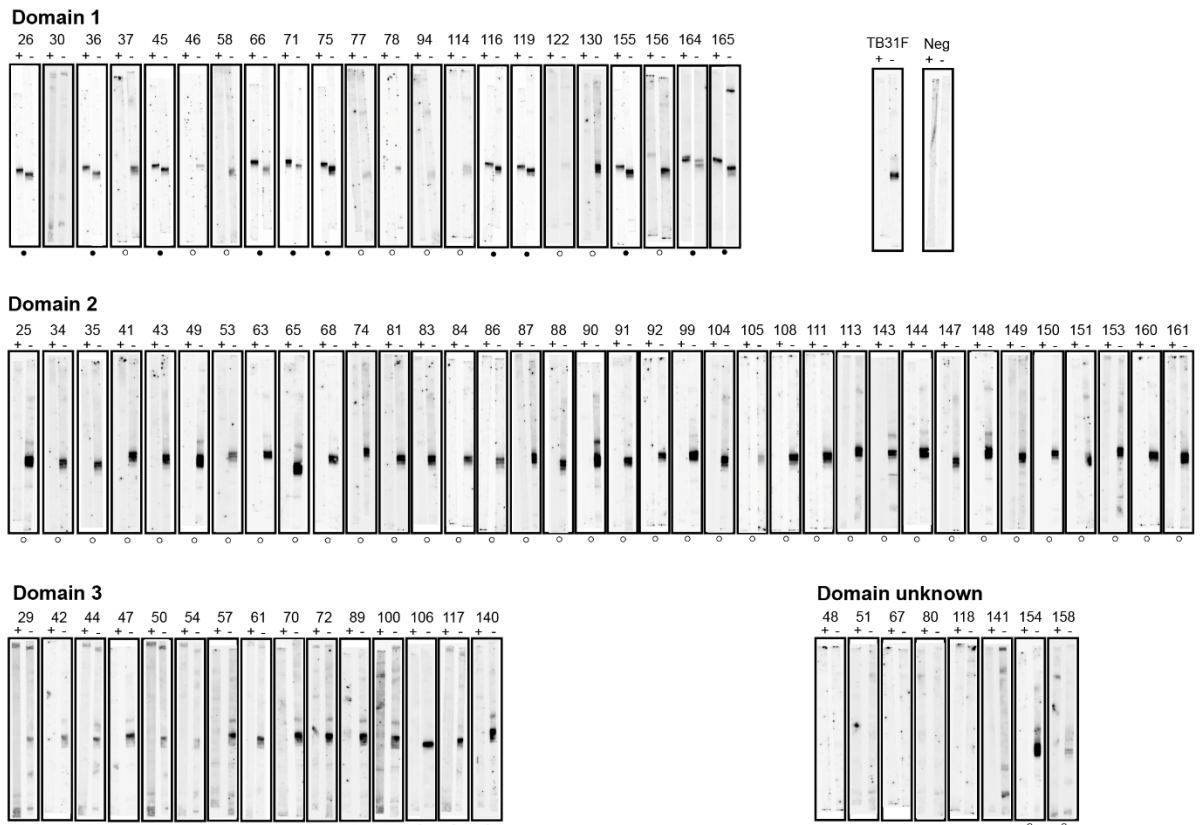

**B**

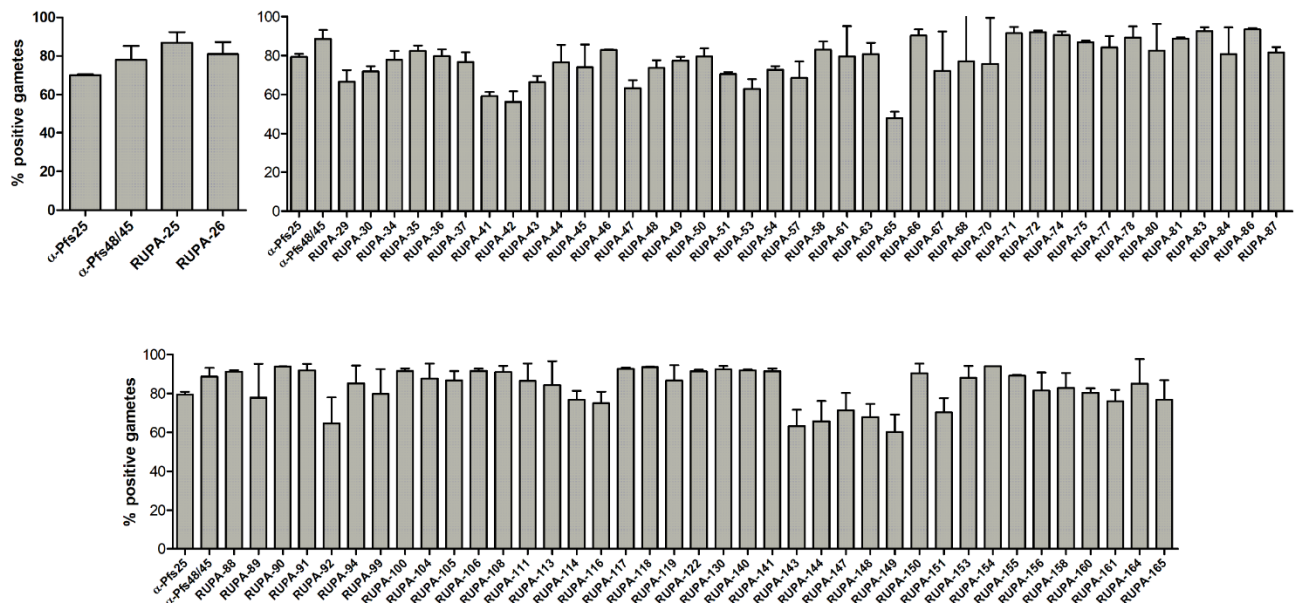

**Figure S2. Recognition of native Pfs48/45 by RUPA antibodies. (a)** Binding of mAbs to gametocyte extract. Gametocyte extract was run on SDS-PAGE gel under reducing (+) and non-reducing (-) conditions. After transfer to nitrocellulose membrane, strips were cut and incubated with individual RUPA antibodies. TB31F was included as a positive control antibody that is conformation-dependent. A non-targeting human IgG was included as negative control (Neg). Closed circles indicate mAbs that

bind to linear epitopes, while open circles indicate mAbs that bind to conformational epitopes. **(b)** Female gamete recognition by mAbs in surface immunofluorescence assay. All antibodies were tested at 5 µg/mL, except for mAbs against Pfs25 (2544, 0.1 µg/mL), Pfs48/45 (TB31F, 0.03 µg/mL). RUPA-25 and RUPA-26 were tested at 5 µg/mL in a separate experiment that included mAbs against Pfs25 (2544, 1 µg/mL) and Pfs48/45 (TB31F, 0.1 µg/mL). Anti-PfCSP mAb 399, which is sporozoite specific and does not recognize female gametes, was used for background correction. Values represent means of two technical replicates after background correction, and error bars show s.d. **Related to Figure 1.**

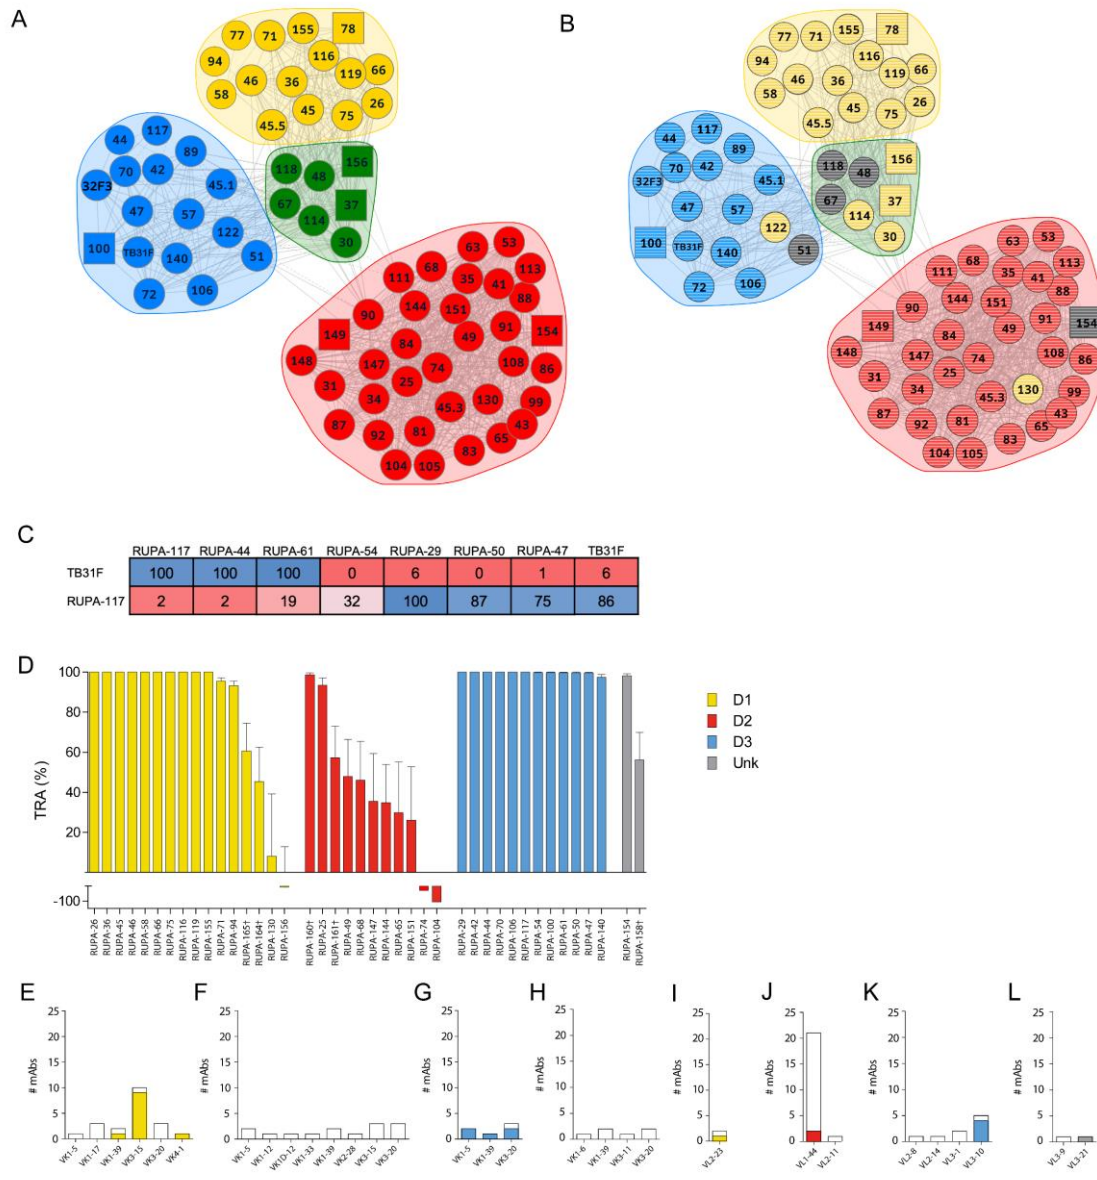

**Figure S3. Competition experiments identified four groups of monoclonal antibodies, transmission reducing activity (TRA) of potent monoclonal antibodies (mAbs) in standard membrane feeding assay (SMFA) and genetic characteristics of light chains.** (a) Competition between monoclonal antibodies (mAbs) was tested in two orientations; one antibody coupled to a chip and the other one in solution, and vice versa. mAbs with data in two directions are shown in circles and those with data in one direction as squares. (b) As in a, but with individual mAbs colored following domain specificity as determined by construct ELISA (Table S1). Yellow, D1; red, D2; blue, D3 and grey, unknown domain. (c) Epitope binning of anti-Pfs48/45-D3 Fabs using biolayer interferometry. Binning data is shown as a matrix where numbers indicate the percentage of potential binding. High competition is displayed in red (low numbers) and low competition is displayed in blue (high numbers). (d) 36 mAbs that showed the highest potency in barcoded membrane feeding assay (Figure 2a) and five mAbs that were not available at the time of high throughput membrane feeding assay (marked with †) were tested at 100  $\mu\text{g}/\text{ml}$  in SMFA with *Anopheles stephensi* mosquitoes and *Plasmodium falciparum* NF54 gametocytes. TRA was calculated as the percentage reduction in oocyst intensity compared to a non-antibody control and obtained from a single feeding experiment with 20 mosquitoes per condition. Error bars indicate 95% confidence intervals. Raw SMFA data is presented in Supplementary file 1. (e-l) Genetic characteristics of light chains. Bar graphs showing number of monoclonal antibodies (mAbs) per (e-h)

kappa and (i-l) lambda light chain family. mAbs are grouped by (e,i) D1-, (f,j) D2- and (g,k) D3-specific mAbs and (h,l) mAbs with unknown specificity. Colored bars represent mAbs with >80% transmission reducing activity at 100 µg/ml. **Related to Figures 1, 2 and 3.**

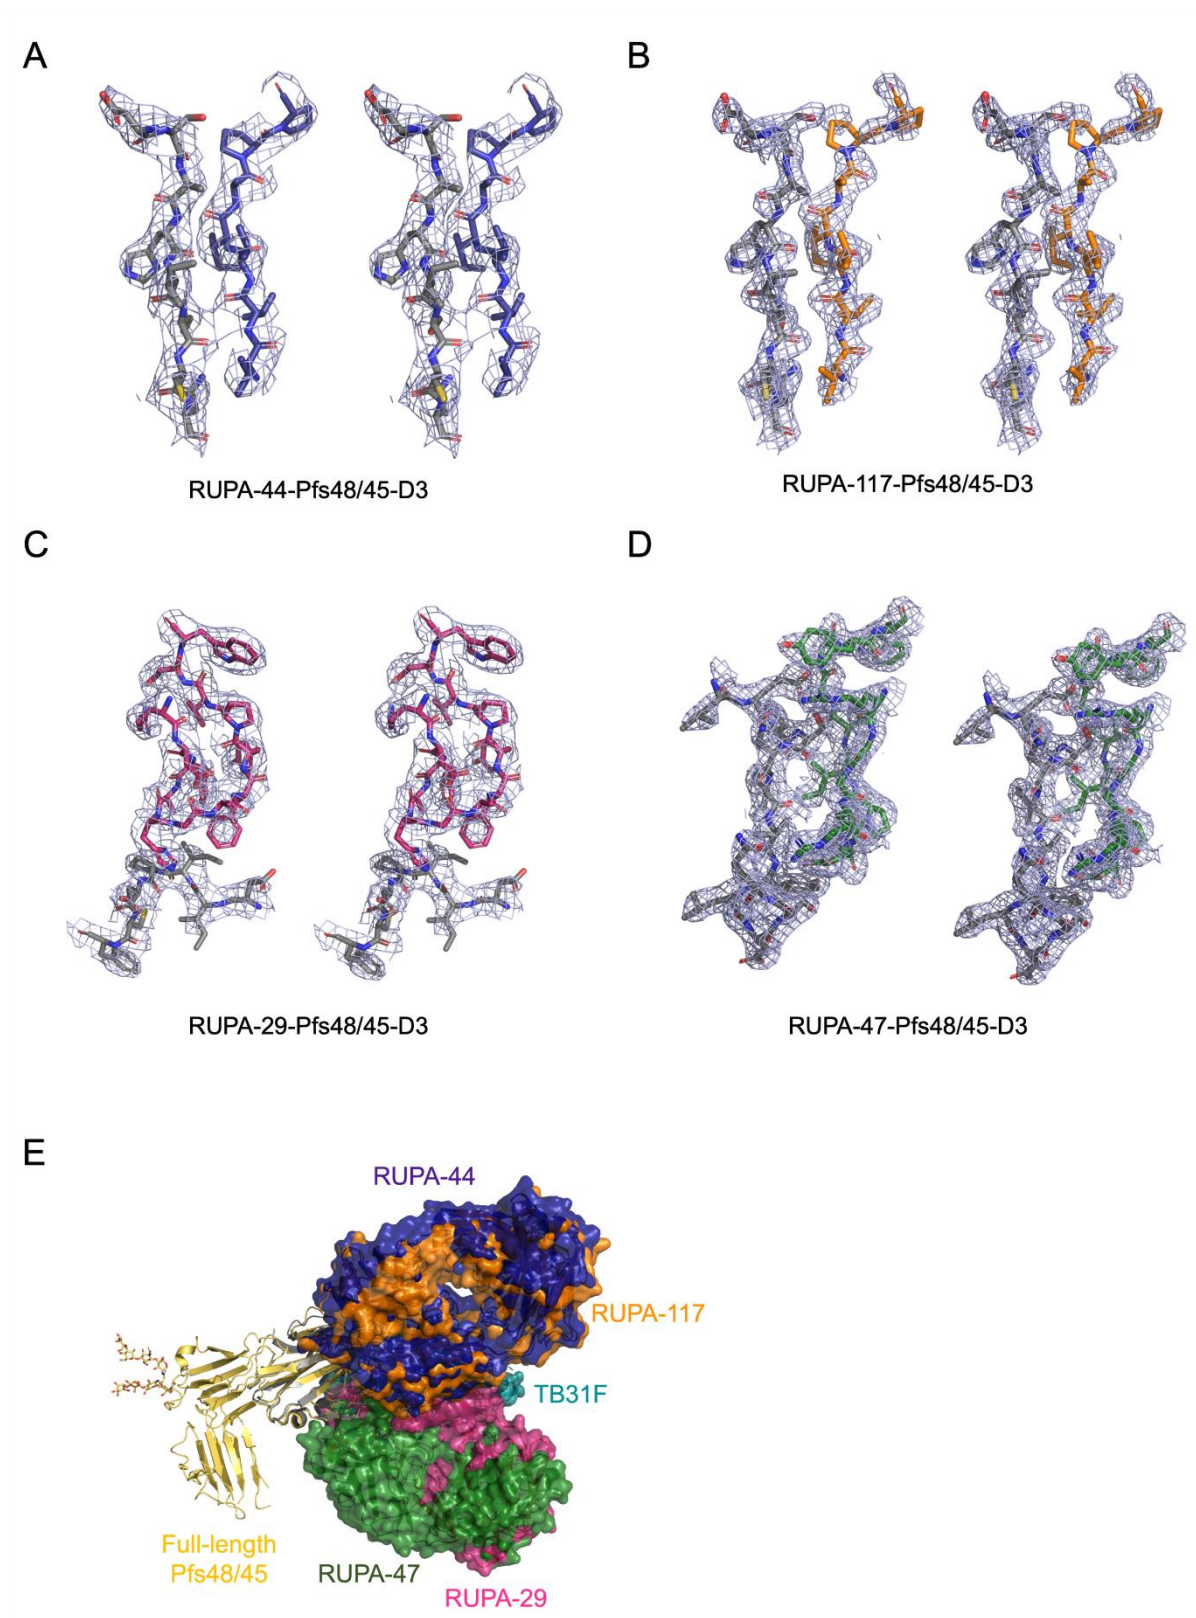

**Figure S4. Protective epitopes of potent human antibodies are accessible in full-length Pfs48/45 structure.** (a) Stereo view of the 2mFo-DFc composite omit electron density map contoured at  $1.5 \sigma$ . Structures of interfaces between Pfs48/45-D3 in grey and RUPA-44 (a) in blue, RUPA-117 (b) in orange, RUPA-29 (c) in pink, and RUPA-47 (d) in green. Electron density is shown as a blue mesh. (e) Fabs RUPA-



44 (dark blue), RUPA-117 (orange), TB31F (teal; PDB ID: 6E63), RUPA-29 (pink), and RUPA-47 (dark green) bound to D3 (grey) overlaid onto full-length Pfs48/45 (yellow; PDB:7ZXF). **Related to Figures 4 and 5.**

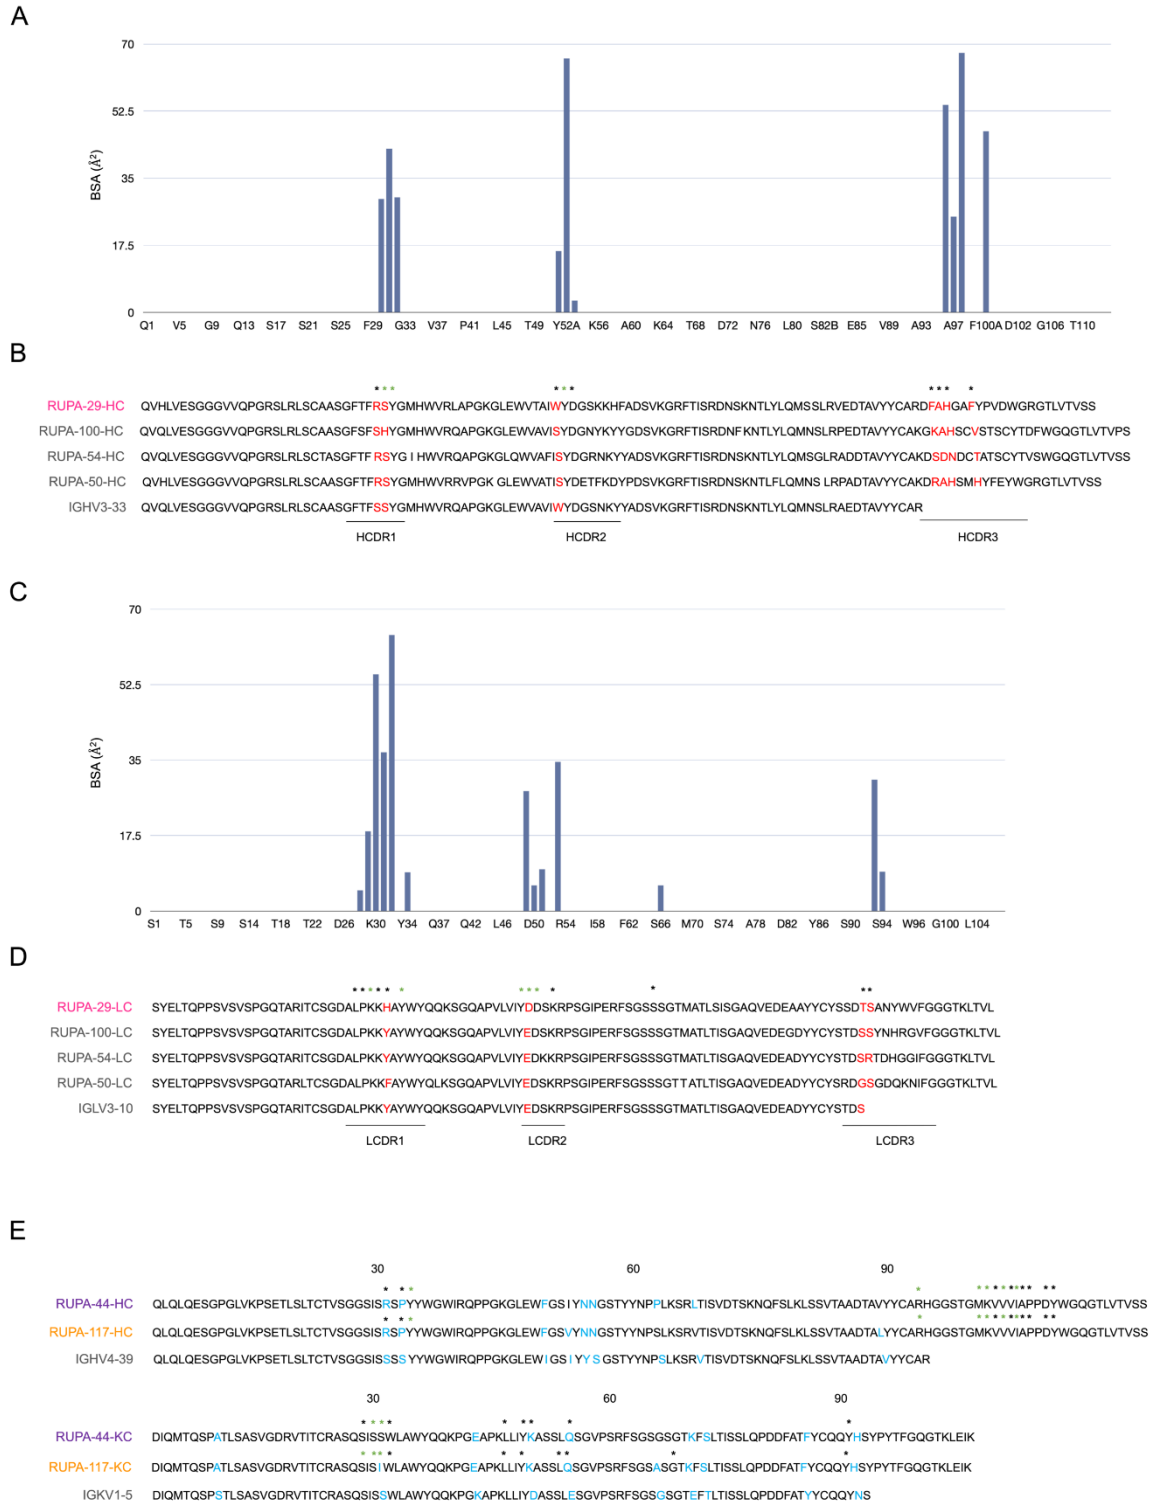

**Figure S5. Alignment of antibodies from potent antibody lineages targeting Pfs48/45-D3 epitopes Ia and Ib. (a)** Buried surface area of each RUPA-29-HC residue in the Pfs48/45-D3-RUPA-29 complex. **(b)** Alignment of the heavy chain sequences of RUPA-29, RUPA-100, RUPA-54, RUPA-50, and germline precursor, IGHV3-33. **(c)** Buried surface area of each RUPA-29-LC residue in the Pfs48/45-D3-RUPA-29 complex. **(d)** Alignment of the lambda chain sequences of RUPA-29, RUPA-100, RUPA-54, RUPA-50, and germline precursor, IGLV3-10. Green asterisks indicate RUPA-29 residues that form H-bonds/salt-bridges, while black asterisks indicate residues that make van der Waals (VdW) interactions with Pfs48/45-D3. Amino acids in red signify contact residues that are not conserved across all antibodies.

(e) Alignment of heavy and light variable chain sequences of RUPA-44 and RUPA-117 with their inferred germline precursor. Mutated residues from the germline are in blue. Asterisks indicate residues that form VdW (black) or electrostatic (green) contacts with Pfs48/45-D3. **Related to Figures 4 and 5.**

**Table S1. Domain specificity of isolated monoclonal antibodies (mAbs) as determined by ELISA.** mAbs that were positive against full-length Pfs48/45, were also tested against fragments of Pfs48/45 (Supplementary figure 3). mAbs were considered Domain 1-specific mAbs if they were positive for Domain 1-2 and negative for Domain 2-3 and Domain 3, Domain 2-specific mAbs if positive for Domain 1-2 and Domain 2-3 and negative for Domain 3, and Domain 3-specific mAbs if positive for Domain 2-3 and Domain 3 and negative for Domain 1-2. Other mAbs have unknown (unk) specificity. Optical density (OD<sub>450</sub>) values are means of three technical replicates and the standard deviation (SD) is shown between brackets. The cutoff was determined by calculating the mean + three standard deviations of seven non-Pfs48/45 mAbs that were included on each ELISA plate. Two mAbs, marked with an asterisk, were negative in full-length Pfs48/45 ELISA but showed high affinity for full-length Pfs48/45 by surface plasmon resonance and were therefore included in further analyses. **Related to Figure 1.**

| Name     | Full-length            |        |                 | Domain 1-2             |        |                 | Domain 2-3             |        |                 | Domain 3               |        |                 | Domain specificity |
|----------|------------------------|--------|-----------------|------------------------|--------|-----------------|------------------------|--------|-----------------|------------------------|--------|-----------------|--------------------|
|          | OD <sub>450</sub> (SD) | Cutoff | Pos=1/<br>Neg=0 | OD <sub>450</sub> (SD) | Cutoff | Pos=1/<br>Neg=0 | OD <sub>450</sub> (SD) | Cutoff | Pos=1/<br>Neg=0 | OD <sub>450</sub> (SD) | Cutoff | Pos=1/<br>Neg=0 |                    |
| RUPA-25  | 1.38 (0.51)            | 0.14   | 1               | 2.13 (0.04)            | 0.30   | 1               | 1.62 (0.09)            | 0.19   | 1               | 0.05 (0.01)            | 0.15   | 0               | 2                  |
| RUPA-26  | 1.28 (0.06)            | 0.14   | 1               | 1.54 (0.07)            | 0.30   | 1               | 0.07 (0.02)            | 0.19   | 0               | 0.06 (0.01)            | 0.15   | 0               | 1                  |
| RUPA-29  | 1.60 (0.04)            | 0.14   | 1               | 0.15 (0.00)            | 0.30   | 0               | 1.69 (0.14)            | 0.19   | 1               | 1.84 (0.04)            | 0.15   | 1               | 3                  |
| RUPA-30  | 0.66 (0.72)            | 0.14   | 1               | 0.35 (0.03)            | 0.30   | 1               | 0.15 (0.02)            | 0.19   | 0               | 0.10 (0.03)            | 0.15   | 0               | 1                  |
| RUPA-34  | 1.30 (0.27)            | 0.14   | 1               | 1.85 (0.05)            | 0.30   | 1               | 0.35 (0.02)            | 0.19   | 1               | 0.05 (0.01)            | 0.15   | 0               | 2                  |
| RUPA-35  | 1.33 (0.08)            | 0.14   | 1               | 1.93 (0.03)            | 0.30   | 1               | 1.15 (0.08)            | 0.19   | 1               | 0.13 (0.03)            | 0.15   | 0               | 2                  |
| RUPA-36  | 1.09 (0.04)            | 0.14   | 1               | 1.64 (0.06)            | 0.30   | 1               | 0.05 (0.00)            | 0.19   | 0               | 0.03 (0.00)            | 0.15   | 0               | 1                  |
| RUPA-37  | 0.80 (0.05)            | 0.14   | 1               | 0.79 (0.04)            | 0.30   | 1               | 0.06 (0.00)            | 0.19   | 0               | 0.04 (0.00)            | 0.15   | 0               | 1                  |
| RUPA-41  | 1.58 (0.11)            | 0.14   | 1               | 2.17 (0.09)            | 0.30   | 1               | 1.54 (0.06)            | 0.19   | 1               | 0.05 (0.00)            | 0.15   | 0               | 2                  |
| RUPA-42  | 1.22 (0.05)            | 0.14   | 1               | 0.12 (0.00)            | 0.30   | 0               | 1.36 (0.06)            | 0.19   | 1               | 1.55 (0.11)            | 0.15   | 1               | 3                  |
| RUPA-43  | 1.50 (0.33)            | 0.14   | 1               | 2.20 (0.02)            | 0.30   | 1               | 1.71 (0.07)            | 0.19   | 1               | 0.06 (0.00)            | 0.15   | 0               | 2                  |
| RUPA-44  | 1.81 (0.11)            | 0.14   | 1               | 0.29 (0.01)            | 0.30   | 0               | 1.80 (0.06)            | 0.19   | 1               | 1.81 (0.11)            | 0.15   | 1               | 3                  |
| RUPA-45  | 0.94 (0.20)            | 0.14   | 1               | 1.20 (0.03)            | 0.30   | 1               | 0.11 (0.00)            | 0.19   | 0               | 0.05 (0.01)            | 0.15   | 0               | 1                  |
| RUPA-46  | 0.61 (0.04)            | 0.14   | 1               | 0.56 (0.02)            | 0.30   | 1               | 0.10 (0.01)            | 0.19   | 0               | 0.04 (0.00)            | 0.15   | 0               | 1                  |
| RUPA-47  | 1.67 (0.04)            | 0.14   | 1               | 0.23 (0.01)            | 0.30   | 0               | 1.84 (0.07)            | 0.19   | 1               | 1.81 (0.05)            | 0.15   | 1               | 3                  |
| RUPA-48  | 0.39 (0.02)            | 0.14   | 1               | 0.17 (0.01)            | 0.30   | 0               | 0.07 (0.01)            | 0.19   | 0               | 0.05 (0.01)            | 0.15   | 0               | Unk                |
| RUPA-49  | 1.54 (0.07)            | 0.14   | 1               | 2.34 (0.14)            | 0.30   | 1               | 1.69 (0.03)            | 0.19   | 1               | 0.06 (0.01)            | 0.15   | 0               | 2                  |
| RUPA-50  | 1.49 (0.05)            | 0.14   | 1               | 0.14 (0.00)            | 0.30   | 0               | 1.68 (0.03)            | 0.19   | 1               | 1.70 (0.05)            | 0.15   | 1               | 3                  |
| RUPA-51  | 0.46 (0.04)            | 0.14   | 1               | 0.10 (0.01)            | 0.30   | 0               | 0.08 (0.01)            | 0.19   | 0               | 0.08 (0.06)            | 0.15   | 0               | Unk                |
| RUPA-53  | 1.86 (0.06)            | 0.14   | 1               | 2.45 (0.15)            | 0.30   | 1               | 1.84 (0.03)            | 0.19   | 1               | 0.06 (0.02)            | 0.15   | 0               | 2                  |
| RUPA-54  | 1.61 (0.10)            | 0.18   | 1               | 0.23 (0.12)            | 0.26   | 0               | 1.87 (0.02)            | 0.19   | 1               | 1.97 (0.04)            | 0.23   | 1               | 3                  |
| RUPA-57  | 1.44 (0.04)            | 0.18   | 1               | 0.08 (0.01)            | 0.26   | 0               | 1.71 (0.02)            | 0.19   | 1               | 1.75 (0.01)            | 0.23   | 1               | 3                  |
| RUPA-58  | 1.29 (0.04)            | 0.18   | 1               | 0.97 (0.04)            | 0.26   | 1               | 0.12 (0.03)            | 0.19   | 0               | 0.19 (0.01)            | 0.23   | 0               | 1                  |
| RUPA-59  | 0.09 (0.01)            | 0.18   | 0               |                        |        |                 |                        |        |                 |                        |        |                 |                    |
| RUPA-61  | 1.65 (0.06)            | 0.18   | 1               | 0.10 (0.01)            | 0.26   | 0               | 1.78 (0.03)            | 0.19   | 1               | 1.89 (0.15)            | 0.23   | 1               | 3                  |
| RUPA-63  | 1.68 (0.04)            | 0.18   | 1               | 2.14 (0.05)            | 0.26   | 1               | 1.57 (0.00)            | 0.19   | 1               | 0.05 (0.00)            | 0.23   | 0               | 2                  |
| RUPA-65  | 2.05 (0.03)            | 0.18   | 1               | 2.16 (0.15)            | 0.26   | 1               | 1.75 (0.08)            | 0.19   | 1               | 0.19 (0.02)            | 0.23   | 0               | 2                  |
| RUPA-66  | 1.39 (0.02)            | 0.18   | 1               | 1.50 (0.09)            | 0.26   | 1               | 0.10 (0.04)            | 0.19   | 0               | 0.19 (0.01)            | 0.23   | 0               | 1                  |
| RUPA-67  | 0.23 (0.01)            | 0.18   | 1               | 0.06 (0.00)            | 0.26   | 0               | 0.11 (0.04)            | 0.19   | 0               | 0.17 (0.06)            | 0.23   | 0               | Unk                |
| RUPA-68  | 1.86 (0.03)            | 0.18   | 1               | 2.02 (0.11)            | 0.26   | 1               | 1.53 (0.05)            | 0.19   | 1               | 0.17 (0.07)            | 0.23   | 0               | 2                  |
| RUPA-70  | 1.76 (0.06)            | 0.18   | 1               | 0.16 (0.00)            | 0.26   | 0               | 1.66 (0.07)            | 0.19   | 1               | 2.23 (0.07)            | 0.23   | 1               | 3                  |
| RUPA-71  | 1.39 (0.02)            | 0.18   | 1               | 1.02 (0.20)            | 0.26   | 1               | 0.13 (0.02)            | 0.19   | 0               | 0.22 (0.01)            | 0.23   | 0               | 1                  |
| RUPA-72  | 1.30 (0.04)            | 0.18   | 1               | 0.06 (0.01)            | 0.26   | 0               | 1.37 (0.03)            | 0.19   | 1               | 1.56 (0.04)            | 0.23   | 1               | 3                  |
| RUPA-74  | 1.96 (0.09)            | 0.18   | 1               | 2.32 (0.11)            | 0.26   | 1               | 1.71 (0.06)            | 0.19   | 1               | 0.09 (0.03)            | 0.23   | 0               | 2                  |
| RUPA-75  | 1.37 (0.06)            | 0.18   | 1               | 1.54 (0.13)            | 0.26   | 1               | 0.10 (0.05)            | 0.19   | 0               | 0.10 (0.07)            | 0.23   | 0               | 1                  |
| RUPA-77  | 1.24 (0.08)            | 0.18   | 1               | 0.97 (0.04)            | 0.26   | 1               | 0.06 (0.00)            | 0.19   | 0               | 0.07 (0.01)            | 0.23   | 0               | 1                  |
| RUPA-78  | 0.89 (0.03)            | 0.18   | 1               | 0.65 (0.08)            | 0.26   | 1               | 0.05 (0.00)            | 0.19   | 0               | 0.06 (0.01)            | 0.23   | 0               | 1                  |
| RUPA-80* | 0.08 (0.00)            | 0.18   | 0               |                        |        |                 |                        |        |                 |                        |        |                 | Unk                |
| RUPA-81  | 1.70 (0.12)            | 0.18   | 1               | 1.93 (0.05)            | 0.26   | 1               | 0.70 (0.04)            | 0.19   | 1               | 0.16 (0.07)            | 0.23   | 0               | 2                  |
| RUPA-83  | 1.79 (0.07)            | 0.18   | 1               | 2.02 (0.11)            | 0.26   | 1               | 1.46 (0.01)            | 0.19   | 1               | 0.15 (0.08)            | 0.23   | 0               | 2                  |
| RUPA-84  | 1.54 (0.07)            | 0.14   | 1               | 2.07 (0.07)            | 0.27   | 1               | 1.63 (0.03)            | 0.15   | 1               | 0.08 (0.01)            | 0.25   | 0               | 2                  |
| RUPA-86  | 1.32 (0.15)            | 0.14   | 1               | 1.84 (0.02)            | 0.27   | 1               | 1.34 (0.05)            | 0.15   | 1               | 0.08 (0.00)            | 0.25   | 0               | 2                  |

|           |             |      |   |             |      |   |             |      |   |             |      |   |     |
|-----------|-------------|------|---|-------------|------|---|-------------|------|---|-------------|------|---|-----|
| RUPA-87   | 1.99 (0.15) | 0.14 | 1 | 2.15 (0.23) | 0.27 | 1 | 1.81 (0.09) | 0.15 | 1 | 0.10 (0.01) | 0.25 | 0 | 2   |
| RUPA-88   | 1.88 (0.09) | 0.14 | 1 | 2.07 (0.14) | 0.27 | 1 | 1.71 (0.10) | 0.15 | 1 | 0.09 (0.00) | 0.25 | 0 | 2   |
| RUPA-89   | 1.53 (0.05) | 0.14 | 1 | 0.13 (0.01) | 0.27 | 0 | 1.54 (0.01) | 0.15 | 1 | 1.76 (0.01) | 0.25 | 1 | 3   |
| RUPA-90   | 1.64 (0.15) | 0.14 | 1 | 2.14 (0.06) | 0.27 | 1 | 1.75 (0.13) | 0.15 | 1 | 0.08 (0.01) | 0.25 | 0 | 2   |
| RUPA-91   | 1.45 (0.06) | 0.14 | 1 | 2.05 (0.14) | 0.27 | 1 | 1.48 (0.06) | 0.15 | 1 | 0.06 (0.00) | 0.25 | 0 | 2   |
| RUPA-92   | 0.95 (0.03) | 0.14 | 1 | 1.57 (0.07) | 0.27 | 1 | 0.79 (0.09) | 0.15 | 1 | 0.07 (0.01) | 0.25 | 0 | 2   |
| RUPA-94   | 0.82 (0.06) | 0.14 | 1 | 0.57 (0.07) | 0.27 | 1 | 0.06 (0.00) | 0.15 | 0 | 0.07 (0.01) | 0.25 | 0 | 1   |
| RUPA-99   | 1.70 (0.08) | 0.14 | 1 | 2.06 (0.19) | 0.27 | 1 | 1.75 (0.03) | 0.15 | 1 | 0.08 (0.00) | 0.25 | 0 | 2   |
| RUPA-100  | 1.54 (0.08) | 0.14 | 1 | 0.14 (0.01) | 0.27 | 0 | 1.77 (0.05) | 0.15 | 1 | 1.92 (0.05) | 0.25 | 1 | 3   |
| RUPA-102  | 0.05 (0.00) | 0.14 | 0 |             |      |   |             |      |   |             |      |   |     |
| RUPA-104  | 1.96 (0.08) | 0.14 | 1 | 2.21 (0.16) | 0.27 | 1 | 1.81 (0.06) | 0.15 | 1 | 0.08 (0.01) | 0.25 | 0 | 2   |
| RUPA-105  | 1.55 (0.08) | 0.14 | 1 | 1.90 (0.14) | 0.27 | 1 | 1.51 (0.04) | 0.15 | 1 | 0.07 (0.00) | 0.25 | 0 | 2   |
| RUPA-106  | 0.97 (0.09) | 0.14 | 1 | 0.06 (0.02) | 0.27 | 0 | 1.14 (0.06) | 0.15 | 1 | 1.25 (0.08) | 0.25 | 1 | 3   |
| RUPA-107  | 0.06 (0.00) | 0.14 | 0 |             |      |   |             |      |   |             |      |   |     |
| RUPA-108  | 1.25 (0.10) | 0.14 | 1 | 1.73 (0.10) | 0.27 | 1 | 0.35 (0.05) | 0.15 | 1 | 0.07 (0.01) | 0.25 | 0 | 2   |
| RUPA-110  | 0.05 (0.01) | 0.14 | 0 |             |      |   |             |      |   |             |      |   |     |
| RUPA-111  | 1.86 (0.17) | 0.14 | 1 | 2.23 (0.21) | 0.27 | 1 | 1.94 (0.08) | 0.15 | 1 | 0.09 (0.03) | 0.25 | 0 | 2   |
| RUPA-113  | 1.59 (0.05) | 0.14 | 1 | 2.01 (0.08) | 0.27 | 1 | 1.62 (0.05) | 0.15 | 1 | 0.07 (0.00) | 0.25 | 0 | 2   |
| RUPA-114  | 0.67 (0.05) | 0.21 | 1 | 0.45 (0.05) | 0.30 | 1 | 0.14 (0.01) | 0.22 | 0 | 0.19 (0.01) | 0.31 | 0 | 1   |
| RUPA-116  | 1.16 (0.07) | 0.21 | 1 | 1.43 (0.06) | 0.30 | 1 | 0.03 (0.00) | 0.12 | 0 | 0.17 (0.01) | 0.31 | 0 | 1   |
| RUPA-117  | 1.65 (0.06) | 0.21 | 1 | 0.24 (0.02) | 0.30 | 0 | 2.07 (0.09) | 0.22 | 1 | 2.07 (0.11) | 0.31 | 1 | 3   |
| RUPA-118* | 0.12 (0.01) | 0.21 | 0 |             |      |   |             |      |   |             |      |   | Unk |
| RUPA-119  | 1.23 (0.09) | 0.21 | 1 | 1.13 (0.04) | 0.30 | 1 | 0.05 (0.00) | 0.22 | 0 | 0.19 (0.04) | 0.31 | 0 | 1   |
| RUPA-120  | 0.06 (0.00) | 0.21 | 0 |             |      |   |             |      |   |             |      |   |     |
| RUPA-121  | 0.11 (0.11) | 0.21 | 0 |             |      |   |             |      |   |             |      |   |     |
| RUPA-122  | 0.82 (0.03) | 0.21 | 1 | 0.35 (0.03) | 0.30 | 1 | 0.11 (0.03) | 0.22 | 0 | 0.18 (0.01) | 0.31 | 0 | 1   |
| RUPA-124  | 0.05 (0.00) | 0.21 | 0 |             |      |   |             |      |   |             |      |   |     |
| RUPA-125  | 0.05 (0.01) | 0.21 | 0 |             |      |   |             |      |   |             |      |   |     |
| RUPA-127  | 0.06 (0.01) | 0.21 | 0 |             |      |   |             |      |   |             |      |   |     |
| RUPA-130  | 1.06 (0.03) | 0.21 | 1 | 1.40 (0.10) | 0.30 | 1 | 0.11 (0.00) | 0.22 | 0 | 0.07 (0.05) | 0.31 | 0 | 1   |
| RUPA-132  | 0.06 (0.01) | 0.21 | 0 |             |      |   |             |      |   |             |      |   |     |
| RUPA-140  | 1.54 (0.02) | 0.21 | 1 | 0.11 (0.01) | 0.30 | 0 | 1.78 (0.09) | 0.22 | 1 | 1.65 (0.10) | 0.31 | 1 | 3   |
| RUPA-141  | 0.26 (0.07) | 0.21 | 1 | 0.08 (0.01) | 0.30 | 0 | 0.15 (0.01) | 0.22 | 0 | 0.07 (0.01) | 0.31 | 0 | Unk |
| RUPA-142  | 0.06 (0.00) | 0.21 | 0 |             |      |   |             |      |   |             |      |   |     |
| RUPA-143  | 0.37 (0.06) | 0.21 | 1 | 0.42 (0.04) | 0.30 | 1 | 0.32 (0.03) | 0.22 | 1 | 0.06 (0.03) | 0.31 | 0 | 2   |
| RUPA-144  | 1.54 (0.04) | 0.21 | 1 | 1.99 (0.07) | 0.30 | 1 | 1.58 (0.09) | 0.22 | 1 | 0.14 (0.08) | 0.31 | 0 | 2   |
| RUPA-145  | 0.15 (0.09) | 0.21 | 0 |             |      |   |             |      |   |             |      |   |     |
| RUPA-146  | 0.06 (0.00) | 0.25 | 0 |             |      |   |             |      |   |             |      |   |     |
| RUPA-147  | 1.82 (0.04) | 0.25 | 1 | 2.08 (0.06) | 0.22 | 1 | 1.62 (0.03) | 0.10 | 1 | 0.05 (0.00) | 0.13 | 0 | 2   |
| RUPA-148  | 1.78 (0.05) | 0.25 | 1 | 2.14 (0.04) | 0.22 | 1 | 1.66 (0.02) | 0.10 | 1 | 0.05 (0.00) | 0.13 | 0 | 2   |
| RUPA-149  | 1.01 (0.04) | 0.25 | 1 | 1.21 (0.22) | 0.22 | 1 | 0.75 (0.15) | 0.10 | 1 | 0.05 (0.00) | 0.13 | 0 | 2   |
| RUPA-150  | 0.71 (0.03) | 0.25 | 1 | 0.78 (0.17) | 0.22 | 1 | 0.45 (0.08) | 0.10 | 1 | 0.04 (0.00) | 0.13 | 0 | 2   |
| RUPA-151  | 1.73 (0.05) | 0.25 | 1 | 2.15 (0.06) | 0.22 | 1 | 1.53 (0.03) | 0.10 | 1 | 0.05 (0.01) | 0.13 | 0 | 2   |
| RUPA-152  | 0.22 (0.01) | 0.25 | 0 |             |      |   |             |      |   |             |      |   |     |
| RUPA-153  | 0.51 (0.03) | 0.25 | 1 | 0.85 (0.08) | 0.22 | 1 | 0.34 (0.04) | 0.10 | 1 | 0.09 (0.00) | 0.13 | 0 | 2   |
| RUPA-154  | 1.67 (0.10) | 0.25 | 1 | 1.99 (0.05) | 0.22 | 1 | 1.69 (0.01) | 0.10 | 1 | 0.22 (0.03) | 0.13 | 1 | Unk |
| RUPA-155  | 1.24 (0.14) | 0.25 | 1 | 1.48 (0.20) | 0.22 | 1 | 0.07 (0.00) | 0.10 | 0 | 0.05 (0.00) | 0.13 | 0 | 1   |
| RUPA-156  | 0.50 (0.09) | 0.25 | 1 | 0.49 (0.02) | 0.22 | 1 | 0.08 (0.01) | 0.10 | 0 | 0.05 (0.00) | 0.13 | 0 | 1   |
| RUPA-157  | 0.06 (0.00) | 0.25 | 0 |             |      |   |             |      |   |             |      |   |     |
| RUPA-158  | 0.38 (0.05) | 0.25 | 1 | 0.15 (0.01) | 0.22 | 0 | 0.07 (0.00) | 0.10 | 0 | 0.04 (0.00) | 0.13 | 0 | Unk |
| RUPA-159  | 0.09 (0.01) | 0.25 | 0 |             |      |   |             |      |   |             |      |   |     |
| RUPA-160  | 1.33 (0.09) | 0.25 | 1 | 1.63 (0.15) | 0.22 | 1 | 1.01 (0.03) | 0.10 | 1 | 0.04 (0.00) | 0.13 | 0 | 2   |
| RUPA-161  | 1.76 (0.02) | 0.25 | 1 | 2.10 (0.06) | 0.22 | 1 | 1.72 (0.10) | 0.10 | 1 | 0.05 (0.00) | 0.13 | 0 | 2   |
| RUPA-162  | 0.07 (0.01) | 0.25 | 0 |             |      |   |             |      |   |             |      |   |     |
| RUPA-163  | 0.12 (0.03) | 0.25 | 0 |             |      |   |             |      |   |             |      |   |     |
| RUPA-164  | 0.32 (0.04) | 0.25 | 1 | 0.58 (0.06) | 0.22 | 1 | 0.05 (0.00) | 0.10 | 0 | 0.04 (0.00) | 0.13 | 0 | 1   |
| RUPA-165  | 0.85 (0.10) | 0.25 | 1 | 1.12 (0.09) | 0.22 | 1 | 0.05 (0.00) | 0.10 | 0 | 0.04 (0.00) | 0.13 | 0 | 1   |

**Table S2. Gene characteristics of Pfs48/45-specific monoclonal antibodies (mAbs).** mAbs are grouped by donor (D=Dutch expatriate, U=Ugandan donor) and domain specificity. **Related to Figure 3.**

| Donor    | Domain | mAb      | V <sub>H</sub> | V <sub>H</sub> Identity to germline (%) | D <sub>H</sub> | J <sub>H</sub> | HCDR3 (AA)                | V <sub>L</sub> | V <sub>L</sub> Identity to germline (%) | J <sub>L</sub> | LCDR3 (AA)   |     |             |
|----------|--------|----------|----------------|-----------------------------------------|----------------|----------------|---------------------------|----------------|-----------------------------------------|----------------|--------------|-----|-------------|
| U        | 1      | RUPA-26  | VH4-34         | 90.4                                    | DH6-19         | JH5            | ARRSSGYRGSRYTGWFDP        | VK3-15         | 96.1                                    | JK4            | QQYNNWPGLT   |     |             |
|          |        | RUPA-30  | VH1-46         | 92.2                                    | DH2-15         | JH3            | ARAGEYCRGIRCYIDGLDI       | VK1-17         | 97.9                                    | JK1            | LQHNDSPWT    |     |             |
|          |        | RUPA-36  | VH4-34         | 89.0                                    | DH6-19         | JH5            | ARRASGWYRQSRYTGWFDP       | VK3-15         | 98.2                                    | JK4            | QQYNNWPGLS   |     |             |
|          |        | RUPA-37  | VH1-46         | 88.5                                    | DH2-15         | JH3            | ARAGEYCRGIRCYVDGIDM       | VK1-17         | 97.5                                    | JK1            | LQHNSPWT     |     |             |
|          |        | RUPA-45  | VH4-34         | 89.0                                    | DH6-19         | JH5            | ARRSSGYRGSRYTGWFDP        | VK3-15         | 96.1                                    | JK4            | QQYNNWPGLT   |     |             |
|          |        | RUPA-46  | VH3-11         | 92.6                                    | DH2 or 15-2a   | JH3            | ARDRKRNSSETYYGALDV        | VK4-1          | 95.4                                    | JK1            | QQYTTPTWT    |     |             |
|          |        | RUPA-58  | VH1-2          | 94.6                                    | DH2-2          | JH4            | ARDYCTGSSCYRTDYDY         | VK1-39         | 94.0                                    | JK5            | QQSYRDPIT    |     |             |
|          |        | RUPA-66  | VH4-34         | 96.2                                    | DH6-19         | JH5            | ARRSSGWYRRSRYTGWFDP       | VK3-15         | 96.5                                    | JK4            | QQYNNWPGLS   |     |             |
|          |        | RUPA-71  | VH3-49         | 90.3                                    | DH3-22         | JH3            | TRNGLRWYDSSGPRGWAFDI      | VK3-15         | 97.6                                    | JK1            | QQYNNWPPWT   |     |             |
|          |        | RUPA-75  | VH4-34         | 91.8                                    | DH3-22         | JH5            | ARRSSGYRGSRYTGWLDP        | VK3-15         | 96.1                                    | JK4            | QQYNNWPGLT   |     |             |
|          |        | RUPA-77  | VH2-5          | 92.3                                    | DH6-6          | JH5            | AHRILAAANYFDY             | VK1-39         | 93.3                                    | JK4            | QQSYTSPLT    |     |             |
|          |        | RUPA-78  | VH3-23         | 90.1                                    | DH6-6          | JH3            | AKFRTPRFSSSGDALDL         | VK3-20         | 96.5                                    | JK2            | QQYGSVPGT    |     |             |
|          |        | RUPA-94  | VH4-39         | 92.3                                    | DH3-16         | JH4            | ARRPNPGFSGGGYFDY          | VL2-23         | 98.0                                    | JL1            | CSYADSSTRNVV |     |             |
|          |        | RUPA-114 | VH1-18         | 92.4                                    | DH5-12         | JH6            | ARGGDRGDGLRFYFALDV        | VK3-20         | 96.5                                    | JK1            | QLYGRSSWT    |     |             |
|          |        | RUPA-116 | VH4-34         | 94.8                                    | DH6-19         | JH5            | ARRSSGYRQSRYTGWFDP        | VK3-15         | 96.8                                    | JK4            | QQYNNWPGLT   |     |             |
|          |        | RUPA-119 | VH4-34         | 89.0                                    | DH6-19         | JH5            | ARRSSGWYRQSRYTGWFDP       | VK3-15         | 98.2                                    | JK4            | QQYNNWPGLT   |     |             |
|          |        | RUPA-122 | VH2-5          | 91.3                                    | DH3-10         | JH5            | ARTMKKITMIRGVPEYEGGVQGFDP | VK1-17         | 94.7                                    | JK4            | QQYSGYFT     |     |             |
|          |        | RUPA-155 | VH4-34         | 90.2                                    | DH6-19         | JH5            | ARRASGWYRQSRYTGWFDPPW     | VK3-15         | 98.2                                    | JK4            | QQYNNWPGLSF  |     |             |
|          |        | RUPA-156 | VH3-48         | 91.3                                    | DH1-26         | JH4            | ARDGRKDSGSFLDHW           | VK1-5          | 93.9                                    | JK1            | QQFDTYWTF    |     |             |
|          |        | RUPA-164 | VH4-59         | 95.1                                    | DH2-2          | JH6            | ARDRVVGSYYYGMDVW          | VK3-20         | 95.0                                    | JK1            | QHYGGSPPRETF |     |             |
|          |        | RUPA-165 | VH4-34         | 95.1                                    | DH6-19         | JH5            | ARRSSGYRGSRYTGWLDPPW      | VK3-15         | 94.6                                    | JK4            | QQYNNWPGLTF  |     |             |
|          |        | D        | 2              | RUPA-25                                 | VH1-8          | 91.6           | DH3-10                    | JH5            | VRGVGSYHSGGWFDP                         | VL1-44         | 93.8         | JL3 | ATWDASLKRRV |
|          |        |          |                | RUPA-34                                 | VH3-53         | 92.7           | DH3-22                    | JH4            | VRDSRGWGYFDD                            | VK3-20         | 95.5         | JK1 | QQYQNSPWT   |
|          |        |          |                | RUPA-35                                 | VH1-8          | 94.6           | DH3-10                    | JH5            | SRGVGYTHGSGGWFDP                        | VL1-44         | 95.5         | JL3 | ATWDDSLKRGV |
|          |        |          |                | RUPA-41                                 | VH1-8          | 93.9           | DH3-10                    | JH5            | ARGVGYTHGAGGWFDP                        | VL1-44         | 94.8         | JL3 | ATWDDSLKRGV |
|          |        |          |                | RUPA-43                                 | VH1-8          | 93.6           | DH3-10                    | JH5            | ARGVGSYHSGGWLDP                         | VL1-44         | 94.5         | JL3 | GTWDDSLKRRV |
|          |        |          |                | RUPA-49                                 | VH1-8          | 90.5           | DH3-10                    | JH5            | ARGVGYTHGSGGWFDP                        | VL1-44         | 95.5         | JL3 | ATWDDSLKRGV |
|          |        |          |                | RUPA-53                                 | VH1-8          | 93.6           | DH3-10                    | JH5            | ARGVGSYHSGGWLDP                         | VK1-33         | 98.9         | JK4 | QQYDNLPLT   |
| RUPA-63  | VH1-8  |          |                | 92.2                                    | DH3-10         | JH5            | ARGVGYTHGSEGWLDP          | VL1-44         | 95.2                                    | JL3            | AAWDDSLKRGV  |     |             |
| RUPA-65  | VH1-8  |          |                | 93.2                                    | DH3-10         | JH5            | ARGVGYTHGSGGWFDP          | VL1-44         | 97.9                                    | JL3            | ATWDDSLKRGV  |     |             |
| RUPA-68  | VH1-8  |          |                | 93.9                                    | DH3-10         | JH5            | ARGVGYTHGAGGWFDP          | VL1-44         | 95.5                                    | JL3            | ATWDDSLKRGV  |     |             |
| RUPA-74  | VH1-8  |          |                | 90.2                                    | DH3-10         | JH5            | ARGVGSYHSGGWIDP           | VL1-44         | 94.5                                    | JL3            | ETWDDSLKRRV  |     |             |
| RUPA-81  | VH3-53 |          |                | 88.7                                    | DH3-10         | JH4            | ARDVRGWGYLDF              | VK3-20         | 95.5                                    | JK1            | QQYGYSPWT    |     |             |
| RUPA-83  | VH1-18 |          |                | 91.9                                    | DH4-11         | JH5            | ARDSRSSQLLQKFDL           | VK1-39         | 92.3                                    | JK1            | QQSFSSPT     |     |             |
| RUPA-84  | VH1-8  |          |                | 93.2                                    | DH3-10         | JH5            | ARGVGYTHGSEGWLDP          | VL1-44         | 95.5                                    | JL3            | ATWDDSLKRGV  |     |             |
| RUPA-86  | VH1-2  |          |                | 95.2                                    | DH3-16         | JH6            | ARLVAYDQGLDV              | VK3-15         | 98.6                                    | JK2            | QQYNNWPPPLYT |     |             |
| RUPA-87  | VH1-2  |          |                | 93.2                                    | DH6-19         | JH4            | ARVVAEAGYFDY              | VK1-12         | 97.9                                    | JK4            | QQANSFPLT    |     |             |
| RUPA-88  | VH1-8  |          |                | 91.2                                    | DH3-10         | JH5            | ARGVGSYHSGGWLDP           | VL1-44         | 94.8                                    | JL3            | ATWDDSLKRRV  |     |             |
| RUPA-90  | VH3-7  |          |                | 94.9                                    | DH2-2          | JH6            | AREGDVFAVAPSARVKGKGGVYGMV | VK2-28         | 99.3                                    | JK3            | MQUALQTPYRVT |     |             |
| RUPA-91  | VH1-8  |          |                | 93.2                                    | DH3-10         | JH5            | ARGVGYTHGSEGWLDP          | VL1-44         | 95.2                                    | JL3            | ATWDDSLKRGV  |     |             |
| RUPA-92  | VH1-8  |          |                | 95.6                                    | DH3-10         | JH5            | ARGVGYRSGGWFDP            | VL2-11         | 96.2                                    | JL2            | CSYAGNYIEI   |     |             |
| RUPA-99  | VH1-8  |          |                | 90.5                                    | DH3-10         | JH5            | ARGVGSYHSGGWLDP           | VL1-44         | 94.1                                    | JL3            | ATWDDSLKRRV  |     |             |
| RUPA-104 | VH1-8  |          |                | 95.3                                    | DH4-17         | JH4            | ARGVTPDPYFDS              | VK1D-12        | 95.1                                    | JK5            | LQANSLPVT    |     |             |
| RUPA-105 | VH1-8  |          |                | 89.9                                    | DH3-10         | JH5            | VRGVGSYHSGGWLDP           | VL1-44         | 93.4                                    | JL3            | ATWDASLKRRV  |     |             |
| RUPA-108 | VH3-53 |          |                | 90.7                                    | DH3-22         | JH4            | VRDSRGWGYFDD              | VK3-20         | 94.8                                    | JK1            | QQYQNSPWT    |     |             |
| RUPA-111 | VH3-48 |          |                | 91.6                                    | DH1-26         | JH4            | ARDGRKDSGSFLDH            | VK1-5          | 95.8                                    | JK1            | QQFDTYWTF    |     |             |
| RUPA-113 | VH1-8  |          |                | 91.6                                    | DH3-10         | JH5            | TRGVGYTHGAGGWFDP          | VL1-44         | 96.9                                    | JL3            | ATWDDSLKRRV  |     |             |
| RUPA-143 | VH1-18 |          |                | 66.7                                    | DH3-16         | JH6            | ARANWYDNNWQEFYFGMDVW      | VK1-5          | 90.3                                    | JK1            | QHYDAYPWTFF  |     |             |
| RUPA-144 | VH1-8  |          |                | 92.7                                    | DH3-10         | JH5            | ARGVGYTHGSEGWLDPW         | VL1-44         | 95.4                                    | JL3            | ATWDDSLKRGV  |     |             |
| RUPA-147 | VH1-8  |          |                | 91.7                                    | DH3-10         | JH5            | VRGVGSYHSGGWFDPPW         | VL1-44         | 93.7                                    | JL3            | ATWDASLKRRV  |     |             |
| RUPA-148 | VH1-8  |          |                | 91.7                                    | DH3-10         | JH5            | VRGVGSYHSGGWFDPPW         | VL1-44         | 93.0                                    | JL3            | ATWDASLKRRV  |     |             |

|   |           |          |         |        |              |                     |                         |                         |        |            |               |            |
|---|-----------|----------|---------|--------|--------------|---------------------|-------------------------|-------------------------|--------|------------|---------------|------------|
|   |           | RUPA-149 | VH3-30  | 91.3   | DH3-3        | JH6                 | AKDKVFGVVANHHQYGLDVW    | VK1-39                  | 88.5   | JK2        | QQSYTTPHFTF   |            |
|   |           | RUPA-150 | VH4-34  | 90.5   | DH6-19       | JH5                 | ARRSSGYRGSRYTGWFDPW     | VK3-15                  | 97.9   | JK1        | QQYNNWPPPWF   |            |
|   |           | RUPA-151 | VH1-8   | 91.0   | DH3-10       | JH5                 | ARGVGTYHGSEGWLDPW       | VL1-44                  | 94.0   | JL3        | CAAWDDSLKRGVF |            |
|   |           | RUPA-153 | VH4-31  | 69.4   | DH3-10       | JH4                 | ARAVGVGRYFYFPSW         | VK3-15                  | 97.5   | JK1        | QQYNNWPPPWF   |            |
|   |           | RUPA-160 | VH1-8   | 91.3   | DH3-10       | JH5                 | VRAVGSYYGGGWFDPW        | VL1-44                  | 94.7   | JL3        | ATWDDSMKREVF  |            |
|   |           | RUPA-161 | VH1-8   | 91.3   | DH3-10       | JH5                 | ARGVGTYHGSGGWFDPW       | VL1-44                  | 96.1   | JL3        | ATWDDSLKRGVF  |            |
|   | 3         | RUPA-29  | VH3-33  | 93.9   | DH4 or 15-4a | JH4                 | ARDFAHGAFYVD            | VL3-10                  | 96.8   | JL3        | YSSDTSANYVW   |            |
|   |           | RUPA-42  | VH4-31  | 95.0   | DH5-12       | JH4                 | ARAGLVAAIRGSRGQQGDYFDH  | VL3-1                   | 94.0   | JL2        | QAWDSSTGV     |            |
|   |           | RUPA-44  | VH4-39  | 96.3   | DH3-22       | JH4                 | ARHGGSTGMKVVIAPPDY      | VK1-5                   | 95.4   | JK2        | QQYHSYPYT     |            |
|   |           | RUPA-47  | VH1-18  | 89.2   | DH3-16       | JH4                 | VRGGRDSPILGGY           | VK3-20                  | 95.8   | JK4        | HQYGSPLT      |            |
|   |           | RUPA-50  | VH3-30  | 90.2   | DH1-26       | JH4                 | AKDRAHSMHYFEY           | VL3-10                  | 95.1   | JL2        | YSRDGSGDQKNI  |            |
|   |           | RUPA-54  | VH3-30  | 94.6   | DH2-2        | JH5                 | AKSDNDCTATSCYTVS        | VL3-10                  | 96.2   | JL2        | YSTDRSDHGGI   |            |
|   |           | RUPA-57  | VH3-30  | 93.9   | DH3-22       | JH4                 | AKSNDHYDNSGYFVY         | VL3-10                  | 96.2   | JL3        | YSRDSNTQRV    |            |
|   |           | RUPA-61  | VH1-46  | 93.5   | DH5-24       | JH6                 | ARVRKRDAYNRRNWGSVFGGMDV | VL2-8                   | 97.0   | JL3        | SSFSGSNNLV    |            |
|   |           | RUPA-70  | VH4-31  | 96.6   | DH5-12       | JH4                 | ARTGLVAAIRGSRGQQGDYFDY  | VL3-1                   | 97.2   | JL2        | QAWDSNTGV     |            |
|   |           | RUPA-72  | VH3-74  | 93.8   | DH2-8        | JH6                 | ARAGCSNGVCPPRYYHGMVDV   | VK3-20                  | 96.9   | JK1        | QHYGNSRVT     |            |
|   |           | RUPA-89  | VH3-23  | 92.2   | DH3-9        | JH5                 | AKEGILRPFDP             | VL2-14                  | 96.2   | JL1        | SSYTSITYHHV   |            |
|   |           | RUPA-100 | VH3-30  | 96.6   | DH2-2        | JH4                 | AKGKAHSCVSTSCYTDF       | VL3-10                  | 97.9   | JL2        | YSTDSSYNHRGV  |            |
|   |           | RUPA-106 | VH3-23  | 95.9   | DH2-8        | JH4                 | AKDTHSNILYLFDY          | VK3-20                  | 97.2   | JK1        | HQYGISPAT     |            |
|   |           | RUPA-117 | VH4-39  | 96.3   | DH3-22       | JH4                 | ARHGGSTGMKVVIAPPDY      | VK1-5                   | 94.7   | JK2        | QQYHSYPYT     |            |
|   |           | ?        | RUPA-48 | VH3-9  | 96.6         | DH2-2               | JH6                     | AKDGGYCSGIRCYHLRGMDV    | VK3-11 | 98.3       | JK2           | QQRSSWPPYT |
|   |           |          | RUPA-51 | VH1-18 | 92.8         | DH5-12              | JH6                     | ARGGDRGDGPRFYGLDV       | VK3-20 | 94.7       | JK1           | SLYGRSSWT  |
|   |           |          | RUPA-67 | VH4-4  | 92.5         | DH2-2               | JH6                     | ARDVSPEECVSTKCYRRPGYMDV | VK1-39 | 95.1       | JK1           | QQSYTTPRT  |
|   | RUPA-80*  |          | VH1-8   | 99.7   | DH2-2        | JH5                 | ARGLPKIYIRGIWFDP        | VL3-9                   | 99.3   | JL2        | QVWDTSTRGV    |            |
|   | RUPA-118* |          | VH4-4   | 94.5   | DH2-2        | JH6                 | ARDLSPEECVSTKCYRRPGYMDV | VK1-39                  | 95.5   | JK1        | QQSYTTPRT     |            |
|   | RUPA-154  |          | VH1-2   | 92.4   | DH6-25       | JH6                 | ARLLYSRAVYYYGMDVW       | VL3-21                  | 96.8   | JL1        | QVWDSSTDHYVF  |            |
|   | RUPA-158  | VH1-18   | 93.1    | DH5-12 | JH6          | ARGGDRGDGPRYYYGLDVW | VK3-20                  | 93.6                    | JK1    | SLYGRSSWTF |               |            |
| U | 1         | RUPA-130 | VH3-15  | 93.7   | DH1-14       | JH4                 | TTDSWAGEVGNYYFDN        | VL2-23                  | 95.9   | JL1        | CSYSKSSTYV    |            |
|   | 3         | RUPA-140 | VH3-23  | 93.6   | DH3-3        | JH4                 | AKVGGRSIFGEATDY         | VK1-39                  | 94.4   | JK4        | QQTYTLPLI     |            |
|   | ?         | RUPA-141 | VH3-7   | 94.9   | DH6-19       | JH3                 | ARDNGARYSGVWYDGWYDAFDI  | VK1-6                   | 97.2   | JK1        | LQDYNYPRT     |            |

**Table S3. Data collection and refinement statistics for the Pfs48/45-D3-RUPA-29 Fab-RUPA-44 Fab co-crystal structure. Related to Figure 4.**

|                                                                         | <i>Pfs48/45-D3-RUPA-29<br/>Fab-RUPA-44 Fab</i> |
|-------------------------------------------------------------------------|------------------------------------------------|
| <b>Wavelength (Å)</b>                                                   | 1.033190                                       |
| <b>Space group</b>                                                      | I23                                            |
| <b>Cell dimensions</b>                                                  |                                                |
| <b>a, b, c (Å)</b>                                                      | 223.1 223.1 223.1                              |
| <b>α, β, γ (°)</b>                                                      | 90 90 90                                       |
| <b>Resolution (Å)</b>                                                   | 29.81 - 2.86 (2.91 - 2.86)*                    |
| <b>No. molecules in ASU</b>                                             | 1                                              |
| <b>No. unique observations</b>                                          | 42,583 (2126)                                  |
| <b>Multiplicity</b>                                                     | 40.8 (41.0)                                    |
| <b>R<sub>meas</sub><sup>1</sup> (%)</b>                                 | 18.3 (312.1)                                   |
| <b>R<sub>pim</sub><sup>2</sup> (%)</b>                                  | 2.5 (14.6)                                     |
| <b>&lt;I/sigma I&gt;</b>                                                | 23.2 (1.5)                                     |
| <b>CC<sub>1/2</sub> (%)</b>                                             | 99.9 (61.2)                                    |
| <b>Completeness (%)</b>                                                 | 99.9 (100)                                     |
| <b>Refinement Statistics</b>                                            |                                                |
| <b>Non-hydrogen atoms</b>                                               | 9,216                                          |
| <b>Macromolecule</b>                                                    | 9,202                                          |
| <b>Water</b>                                                            | 0                                              |
| <b>Hetero atom</b>                                                      | 14                                             |
| <b>R<sub>factor</sub><sup>3</sup>/ R<sub>free</sub><sup>4</sup> (%)</b> | 18.5/ 22.3                                     |
| <b>Rms deviations from ideality</b>                                     |                                                |
| <b>Bond lengths (Å)</b>                                                 | 0.002                                          |
| <b>Bond angle (°)</b>                                                   | 0.54                                           |
| <b>Ramachandran plot</b>                                                |                                                |
| <b>Favoured regions (%)</b>                                             | 96.0                                           |
| <b>Allowed regions (%)</b>                                              | 4.0                                            |
| <b>B-factors (Å<sup>2</sup>)</b>                                        |                                                |
| <b>Wilson B-factor</b>                                                  | 85.7                                           |
| <b>Average B-factors</b>                                                | 95.2                                           |
| <b>Average macromolecule</b>                                            | 95.1                                           |
| <b>Average hetero atom</b>                                              | 156.4                                          |
| <b>Average water</b>                                                    | -                                              |

\*Values in parentheses are for the highest-resolution shell.

$$^1R_{\text{meas}} = \sum_{\text{hkl}} [N/(N-1)]^{1/2} \sum_i |I_{\text{hkl},i} - \langle I_{\text{hkl}} \rangle| / \sum_{\text{hkl}} \langle I_{\text{hkl}} \rangle$$

$$^2R_{\text{pim}} = \sum_{\text{hkl}} [1/(N-1)]^{1/2} \sum_i |I_{\text{hkl},i} - \langle I_{\text{hkl}} \rangle| / \sum_{\text{hkl}} \langle I_{\text{hkl}} \rangle$$

$$^3R_{\text{work}} = (\sum | |F_o| - |F_c| |) / (\sum |F_o|).$$

<sup>4</sup>R<sub>free</sub> is calculated for 5% of the data that was not included in refinement.



**Table S4. Intermolecular contacts for the Pfs48/45-D3-RUPA-29 Fab and Pfs48/45-D3-RUPA-47 Fab co-complexes.** VDW=van Der Waals, HB=Hydrogen Bond, SB=Salt Bridge. **Related to Figure 4.**

| Pfs48/45-D3-RUPA-29 Fab co-complex    |                  |                                                 | Pfs48/45-D3-RUPA-47 Fab co-complex    |                  |                                                |
|---------------------------------------|------------------|-------------------------------------------------|---------------------------------------|------------------|------------------------------------------------|
| RUPA-29 Residue (BSA Å <sup>2</sup> ) | Interaction Type | Pfs48/45-D3 Residue                             | RUPA-47 Residue (BSA Å <sup>2</sup> ) | Interaction Type | Pfs48/45-D3 Residue                            |
| <b>H-Arg30 (29.6)</b>                 |                  |                                                 | <b>H-Gln 1 (16.2)</b>                 |                  |                                                |
| Arg                                   | VDW              | Gln355, Tyr371                                  | Gln                                   | VDW              | Glu362                                         |
| <b>H-Ser31 (42.7)</b>                 |                  |                                                 | <b>H-Val 2 (18.3)</b>                 |                  |                                                |
| Ser                                   | VDW              | Gln355, Ile369, Tyr371                          | Val                                   | VDW              | Glu362, Glu360                                 |
| Ser <sup>O</sup>                      | HB               | Gln355 <sup>NE2</sup>                           | <b>H-Gly 26 (5.5)</b>                 |                  |                                                |
| Ser <sup>OG</sup>                     | HB               | Tyr371 <sup>OH</sup>                            | Gly                                   | VDW              | Glu362                                         |
| <b>H-Tyr32 (30.0)</b>                 |                  |                                                 | <b>H-Tyr 27 (7.7)</b>                 |                  |                                                |
| Tyr                                   | VDW              | Ser367, Ile369                                  | Tyr                                   | VDW              | Glu360                                         |
| Tyr <sup>OH</sup>                     | HB               | Ser367 <sup>O</sup>                             | <b>H-Asn 31 (13.5)</b>                |                  |                                                |
| <b>H-Trp52 (16.0)</b>                 |                  |                                                 | Asn                                   | VDW              | Gln 358                                        |
| Trp                                   | VDW              | Asp351                                          | Asn <sup>O</sup>                      | HB               | Gln358 <sup>NE2</sup>                          |
| <b>H-Tyr52A (66.2)</b>                |                  |                                                 | <b>H-Phe 32 (53.6)</b>                |                  |                                                |
| Tyr                                   | VDW              | Asp351, Phe354, Gln355, Tyr371                  | Phe                                   | VDW              | Gln358, Ser367, Glu360, Asn368                 |
| Tyr <sup>OH</sup>                     | HB               | Asp351 <sup>OD2</sup>                           | <b>H-Tyr 53 (25.7)</b>                |                  |                                                |
| <b>H-Asp53 (3.1)</b>                  |                  |                                                 | Tyr                                   | VDW              | Ser374                                         |
| Asp                                   | VDW              | Asp351                                          | <b>H-Arg94 (46.4)</b>                 |                  |                                                |
| <b>H-Phe96 (54.1)</b>                 |                  |                                                 | Arg                                   | VDW              | Ser367, Glu365, Glu360, Asn368                 |
| Phe                                   | VDW              | Ile349, Tyr357, Glu365                          | Arg <sup>NH1</sup>                    | SB               | Glu360 <sup>OE2</sup>                          |
| <b>H-Ala97 (25.0)</b>                 |                  |                                                 | Arg <sup>NE</sup>                     | HB               | Ser367 <sup>OG</sup>                           |
| Ala                                   | VDW              | Ile349, Tyr357, Ile369                          | Arg <sup>NH2</sup>                    | HB               | Asn368 <sup>OD1</sup>                          |
| <b>H-His98 (67.7)</b>                 |                  |                                                 | Arg <sup>NH2</sup>                    | HB               | Ser367 <sup>OG</sup>                           |
| His                                   | VDW              | Ile348, Ile349, Pro350, Asp351, Gln 355, Ile369 | Arg <sup>NH2</sup>                    | HB               | Glu360 <sup>OE1</sup>                          |
| <b>H-Phe100A (47.2)</b>               |                  |                                                 | <b>H-Gly95 (4.7)</b>                  |                  |                                                |
| Phe                                   | VDW              | Asp347, Ile348, Ile349                          | Gly                                   | VDW              | Ser367                                         |
| <b>L-Leu28 (4.8)</b>                  |                  |                                                 | <b>H-Gly96 (17.6)</b>                 |                  |                                                |
| Leu                                   | VDW              | Lys416                                          | Gly                                   | VDW              | Ser367, Ile369                                 |
| <b>L-Pro29 (18.5)</b>                 |                  |                                                 | <b>H-Arg97 (89.5)</b>                 |                  |                                                |
| Pro                                   | VDW              | Asp321, Lys416                                  | Arg                                   | VDW              | Gln358, Val370, Ile369, Ser367, Ser374, Gln375 |
| <b>L-Lys30 (54.9)</b>                 |                  |                                                 | Arg <sup>NH1</sup>                    | HB               | Gln375 <sup>OE1</sup>                          |
| Lys                                   | VDW              | Asp415, Lys416                                  | Arg <sup>NH2</sup>                    | HB               | Gln375 <sup>OE1</sup>                          |
| Lys <sup>O</sup>                      | HB               | Lys416 <sup>N</sup>                             | <b>H-Asp98 (67.8)</b>                 |                  |                                                |
| <b>L-Lys31 (36.8)</b>                 |                  |                                                 | Asp                                   | VDW              | Ile369, Tyr371, Val370, Ser374, Gln375         |
| Lys                                   | VDW              | Asp347, Asp415, Lys416                          | Asp <sup>OD2</sup>                    | HB               | Tyr371 <sup>N</sup>                            |
| <b>L-His32 (64.0)</b>                 |                  |                                                 | <b>H-Ser99 (32.6)</b>                 |                  |                                                |
| His                                   | VDW              | Lys413, Asp415, Lys416                          | Ser                                   | VDW              | Tyr371, Gln355                                 |
| <b>L-Tyr34 (9.0)</b>                  |                  |                                                 | <b>H-Ile100A (60.3)</b>               |                  |                                                |
| Tyr                                   | VDW              | Lys413                                          | Ile                                   | VDW              | Pro366, Ile369, Ser367, Gln 355                |
| Tyr <sup>OH</sup>                     | HB               | Lys413 <sup>NZ</sup>                            | <b>H-Leu100B (11.5)</b>               |                  |                                                |
| <b>L-Tyr49 (27.8)</b>                 |                  |                                                 | Leu                                   | VDW              | Pro366, Ser367                                 |

|                       |     |                       |                         |     |                                |
|-----------------------|-----|-----------------------|-------------------------|-----|--------------------------------|
| Tyr                   | VDW | Leu364, Glu365        | <b>H-Gly100C (23.6)</b> |     |                                |
| Tyr <sup>OH</sup>     | HB  | Glu365 <sup>OE2</sup> | Gly                     | VDW | Ser367, Glu365, Pro366         |
| <b>L-Asp50 (5.9)</b>  |     |                       | <b>H-Gly101 (10.7)</b>  |     |                                |
| Asp                   | VDW | Lys413                | Gly                     | VDW | Glu365                         |
| Asp <sup>OD1</sup>    | SB  | Lys413 <sup>NZ</sup>  | Gly <sup>N</sup>        | HB  | Glu365 <sup>OE2</sup>          |
| <b>L-Asp51 (9.7)</b>  |     |                       | <b>H-Tyr102 (51.5)</b>  |     |                                |
| Asp                   | VDW | Lys416                | Tyr                     | VDW | Glu365, Ser367, Glu362, Glu363 |
| Asp <sup>OD2</sup>    | SB  | Lys416 <sup>NZ</sup>  | Tyr <sup>N</sup>        | HB  | Glu365 <sup>OE2</sup>          |
| <b>L-Lys53 (34.6)</b> |     |                       | <b>K-Arg29 (54.1)</b>   |     |                                |
| Lys                   | VDW | Leu364, Glu365        | Arg                     | VDW | Asp351, Phe354, Gln355,        |
| <b>L-Ser66 (5.9)</b>  |     |                       | Arg <sup>NH1</sup>      | SB  | Asp351 <sup>OD2</sup>          |
| Ser                   | VDW | Lys416                | Arg <sup>NH1</sup>      | HB  | Gln355 <sup>OE1</sup>          |
| Ser <sup>OG</sup>     | HB  | Lys416 <sup>NZ</sup>  | Arg <sup>NH2</sup>      | HB  | Gln355 <sup>OE1</sup>          |
| <b>L-Thr93 (30.5)</b> |     |                       | <b>K-Ser30 (37.2)</b>   |     |                                |
| Thr                   | VDW | Asp347                | Ser                     | VDW | Pro350, Asp351, Ile348         |
| <b>L-Ser94 (9.1)</b>  |     |                       | <b>K-Met31 (36.9)</b>   |     |                                |
| Ser                   | VDW | Asp390                | Met                     | VDW | Asp347                         |
|                       |     |                       | <b>K-Tyr32 (68.5)</b>   |     |                                |
|                       |     |                       | Tyr                     | VDW | Pro350, Asp351, Gln355, Ile369 |
|                       |     |                       | Tyr <sup>OH</sup>       | HB  | Asp351 <sup>N</sup>            |
|                       |     |                       | Tyr <sup>OH</sup>       | HB  | Gln355 <sup>OE1</sup>          |
|                       |     |                       | <b>K-Leu46 (25.4)</b>   |     |                                |
|                       |     |                       | Leu                     | VDW | Glu365, Pro366                 |
|                       |     |                       | <b>K-His49 (55.4)</b>   |     |                                |
|                       |     |                       | His                     | VDW | Tyr357, Leu364, Glu365, Pro366 |
|                       |     |                       | <b>K-Ser52 (37.4)</b>   |     |                                |
|                       |     |                       | Ser                     | VDW | Lys413, Asp347                 |
|                       |     |                       | Ser <sup>OG</sup>       | HB  | Lys413 <sup>NZ</sup>           |
|                       |     |                       | <b>K-Ile53 (65.6)</b>   |     |                                |
|                       |     |                       | Ile                     | VDW | Ile349, Tyr357, Lys413         |
|                       |     |                       | <b>K-Thr56 (35.9)</b>   |     |                                |
|                       |     |                       | Thr                     | VDW | Glu363                         |
|                       |     |                       | <b>K-Tyr91 (31.9)</b>   |     |                                |
|                       |     |                       | Tyr                     | VDW | Ile369, Pro366                 |

**Table S5. Binding affinities of RUPA-29, RUPA-47, RUPA-44, and RUPA-117 Fabs to Pfs48/45-D3 single point mutants. Related to Figures 4 and 5.**

| Fab             | Pfs48/45-D3 constructs | $K_D$ (M) – binding affinity | $K_{on}$ (1/Ms) – on rate | $K_{off}$ (1/s) – off rate | $R^2$ – the coefficient of determination |
|-----------------|------------------------|------------------------------|---------------------------|----------------------------|------------------------------------------|
| <b>RUPA-29</b>  | Stabilized WT          | $3.7E-10 \pm 4E-11$          | $5.1E+5$                  | $2.1E-4$                   | 0.982                                    |
|                 | K416N                  | $1.1E-7 \pm 4E-9$            | $4.2E+5$                  | $4.5E-2$                   | 0.991                                    |
| <b>RUPA-47</b>  | Stabilized WT          | $3.3E-10 \pm 1E-11$          | $3.9E+5$                  | $1.2E-4$                   | 0.999                                    |
|                 | K416N                  | $5.3E-10 \pm 2E-11$          | $4.5E+5$                  | $2.2E-4$                   | 0.997                                    |
| <b>RUPA-44</b>  | Stabilized WT          | $3.9E-9 \pm 1E-11$           | $2.2E+5$                  | $8.5E-4$                   | 0.984                                    |
|                 | L314I                  | $3.2E-9 \pm 8E-11$           | $2.8E+5$                  | $8.9E-4$                   | 0.986                                    |
|                 | D320H                  | $1.6E-8 \pm 3E-10$           | $2.0E+5$                  | $3.3E-3$                   | 0.986                                    |
|                 | S322N                  | $6.8E-9 \pm 2E-10$           | $2.1E+5$                  | $1.4E-3$                   | 0.985                                    |
|                 | K416N                  | $3.1E-9 \pm 1E-10$           | $3.0E+5$                  | $9.2E-3$                   | 0.976                                    |
| <b>RUPA-117</b> | Stabilized WT          | $1.8E-9 \pm 5E-11$           | $4.6E+5$                  | $7.6E-4$                   | 0.984                                    |
|                 | L314I                  | $1.9E-9 \pm 6E-11$           | $4.2E+5$                  | $7.2E-4$                   | 0.985                                    |
|                 | D320H                  | $7.7E-9 \pm 9E-11$           | $4.3E+5$                  | $3.3E-3$                   | 0.988                                    |
|                 | S322N                  | $2.8E-9 \pm 5E-11$           | $4.4E+5$                  | $1.2E-3$                   | 0.981                                    |
|                 | K416N                  | $2.4E-9 \pm 6E-11$           | $4.7E+5$                  | $1.1E-3$                   | 0.983                                    |

**Table S6. Intermolecular contacts for the Pfs48/45-D3-RUPA-117 Fab and Pfs48/45-D3-RUPA-44 Fab co-complexes.** VDW=van Der Waals, HB=Hydrogen Bond, SB=Salt Bridge. **Related to Figure 5.**

| Pfs48/45-D3-RUPA-117 Fab co-complex    |                  |                                                | Pfs48/45-D3-RUPA-44 Fab co-complex    |                  |                                                |
|----------------------------------------|------------------|------------------------------------------------|---------------------------------------|------------------|------------------------------------------------|
| RUPA-117 Residue (BSA Å <sup>2</sup> ) | Interaction Type | Pfs48/45-D3 Residue                            | RUPA-44 Residue (BSA Å <sup>2</sup> ) | Interaction Type | Pfs48/45-D3 Residue                            |
| <b>H-Arg31 (14.2)</b>                  |                  |                                                | <b>H-Arg31 (20.4)</b>                 |                  |                                                |
| Arg                                    | VDW              | Leu318                                         | Arg                                   | VDW              | Leu318                                         |
| <b>H-Pro33 (59.1)</b>                  |                  |                                                | <b>H-Pro33 (59.4)</b>                 |                  |                                                |
| Pro                                    | VDW              | Leu314, Val319, Leu318,                        | Pro                                   | VDW              | Leu314, Leu318, Val319                         |
| <b>H-Tyr34 (46.5)</b>                  |                  |                                                | <b>H-Tyr34 (50.1)</b>                 |                  |                                                |
| Tyr                                    | VDW              | Leu318, Ala323, Val319, Asp320                 | Tyr                                   | VDW              | Leu318, Val319, Asp320, Ala323                 |
| Tyr <sup>OH</sup>                      | HB               | Asp320 <sup>N</sup>                            | Tyr <sup>OH</sup>                     | HB               | Asp320 <sup>N</sup>                            |
| <b>H-Arg94 (19.1)</b>                  |                  |                                                | <b>H-Arg94 (17.6)</b>                 |                  |                                                |
| Arg                                    | VDW              | Asp320                                         | Arg                                   | VDW              | Asp320                                         |
| Arg <sup>NH2</sup>                     | SB               | Asp320 <sup>OD2</sup>                          | Arg <sup>NH2</sup>                    | SB               | Asp320 <sup>OD2</sup>                          |
| <b>H-Met 100A (10.4)</b>               |                  |                                                | <b>H-Met 100A (9.8)</b>               |                  |                                                |
| Met                                    | VDW              | Asn328, Ser326                                 | Met                                   | VDW              | Asn328                                         |
| Met <sup>O</sup>                       | HB               | Asn328 <sup>ND2</sup>                          | Met <sup>O</sup>                      | HB               | Asn328 <sup>ND2</sup>                          |
| <b>H-Lys100B (81.5)</b>                |                  |                                                | <b>H-Lys100B (89.3)</b>               |                  |                                                |
| Lys                                    | VDW              | Asn328, Ser326, Cys327, Asp312, Val329, His330 | Lys                                   | VDW              | Asp312, Ser326, Cys327, Asn328, Val329, His330 |
| Lys <sup>O</sup>                       | HB               | Asn328 <sup>N</sup>                            | Lys <sup>O</sup>                      | HB               | Asn328 <sup>N</sup>                            |
| Lys <sup>O</sup>                       | HB               | Asn328 <sup>ND2</sup>                          | Lys <sup>O</sup>                      | HB               | Asn328 <sup>ND2</sup>                          |
| Lys <sup>NZ</sup>                      | HB               | Asn328 <sup>O</sup>                            | Lys <sup>NZ</sup>                     | HB               | Asn328 <sup>O</sup>                            |
| Lys <sup>NZ</sup>                      | SB               | Asp312 <sup>OD2</sup>                          | Lys <sup>NZ</sup>                     | SB               | Asp312 <sup>OD2</sup>                          |
| <b>H-Val100C (89.9)</b>                |                  |                                                | <b>H-Val100C (91.7)</b>               |                  |                                                |
| Val                                    | VDW              | Ser326, Asn328, Cys327, Leu314, Asp312, Ser313 | Val                                   | VDW              | Asp312, Ser313, Leu314, Ser326, Cys327, Asn328 |
| <b>H-Val100D (39.7)</b>                |                  |                                                | <b>H-Val100D (40.1)</b>               |                  |                                                |
| Val                                    | VDW              | Ser326, His324, Ile325                         | Val                                   | VDW              | Leu314, His324, Ile325, Ser326                 |
| Val <sup>N</sup>                       | HB               | Ser326 <sup>O</sup>                            | Val <sup>N</sup>                      | HB               | Ser326 <sup>O</sup>                            |
| Val <sup>O</sup>                       | HB               | Ser326 <sup>N</sup>                            | Val <sup>O</sup>                      | HB               | Ser326 <sup>N</sup>                            |
| <b>H-Val100E (45.0)</b>                |                  |                                                | <b>H-Val100E (48.2)</b>               |                  |                                                |
| Val                                    | VDW              | His324, Leu314, Ile325, Val319, Ala323         | Val                                   | VDW              | Leu314, Val319, Ala323, His324, Ile325         |
| <b>H-Ile100F (53.3)</b>                |                  |                                                | <b>H-Ile100F (48.5)</b>               |                  |                                                |
| Ile                                    | VDW              | Ile325, Ala323, His324, Ser322, Ser326         | Ile                                   | VDW              | Ser322, Ala323, His324, Ile325, Ser326         |
| Ile <sup>O</sup>                       | HB               | His324 <sup>N</sup>                            | Ile <sup>O</sup>                      | HB               | His324 <sup>N</sup>                            |
| Ile <sup>N</sup>                       | HB               | His324 <sup>O</sup>                            | Ile <sup>N</sup>                      | HB               | His324 <sup>O</sup>                            |
| <b>H-Ala100G (12.6)</b>                |                  |                                                | <b>H-Ala100G (15.7)</b>               |                  |                                                |
| Ala                                    | VDW              | Ser322, Ala323, His324                         | Ala                                   | VDW              | Ser322, Ala323, His324                         |
| <b>H-Pro100H (24.6)</b>                |                  |                                                | <b>H-Pro100H (21.7)</b>               |                  |                                                |
| Pro                                    | VDW              | Ser322                                         | Pro                                   | VDW              | Ser322                                         |
| <b>H-Asp101 (19.5)</b>                 |                  |                                                | <b>H-Asp101 (21.8)</b>                |                  |                                                |

|                       |     |                           |                       |     |                                           |
|-----------------------|-----|---------------------------|-----------------------|-----|-------------------------------------------|
| Asp                   | VDW | Ser322, Asp320            | Asp                   | VDW | Asp320, Ser322                            |
| <b>H-Tyr102 (6.7)</b> |     |                           | <b>H-Tyr102 (9.9)</b> |     |                                           |
| Tyr                   | VDW | Asp320                    | Tyr                   | VDW | Asp320                                    |
| <b>K-Ser28 (26.3)</b> |     |                           | <b>K-Ser28 (27.8)</b> |     |                                           |
| Ser                   | VDW | Ser361                    | Ser                   | VDW | Glu362                                    |
| Ser <sup>OG</sup>     | HB  | Ser361 <sup>O</sup>       |                       |     |                                           |
| <b>K-Ser30 (24.3)</b> |     |                           | <b>K-Ser30 (38.4)</b> |     |                                           |
| Ser                   | VDW | Glu363                    | Ser                   | VDW | Glu362, Glu363, Leu364                    |
| Ser <sup>OG</sup>     | HB  | Glu363 <sup>OE2</sup>     | Ser <sup>OG</sup>     | HB  | Glu363 <sup>O</sup>                       |
| <b>K-Ile31 (30.5)</b> |     |                           | <b>K-Ser31 (34.7)</b> |     |                                           |
| Ile                   | VDW | Glu363                    | Ser                   | VDW | Glu363, Leu364                            |
| Ile <sup>N</sup>      | HB  | Glu363 <sup>OE2</sup>     | Ser <sup>N</sup>      | HB  | Glu363 <sup>O</sup>                       |
| <b>K-Trp32 (67.0)</b> |     |                           | <b>K-Trp32 (54.9)</b> |     |                                           |
| Trp                   | VDW | His324, Tyr420            | Trp                   | VDW | His324                                    |
| <b>K-Leu46 (11.1)</b> |     |                           | <b>K-Leu46 (10.7)</b> |     |                                           |
| Leu                   | VDW | Ser322                    | Leu                   | VDW | Ser322                                    |
| <b>K-Tyr49 (76.0)</b> |     |                           | <b>K-Tyr49 (52.7)</b> |     |                                           |
| Tyr                   | VDW | Ser322, Asp321,<br>Lys416 | Tyr                   | VDW | Asp321, Ser322                            |
| <b>K-Leu54 (6.6)</b>  |     |                           | <b>K-Lys50 (61.6)</b> |     |                                           |
| Leu                   | VDW | Lys416                    | Lys                   | VDW | Asp321, Ser322, Ala323,<br>His324, Leu364 |
| <b>K-Gln55 (7.2)</b>  |     |                           | <b>K-Gln55 (7.6)</b>  |     |                                           |
| Gln                   | VDW | Ser322                    | Gln                   | VDW | Ser322                                    |
| <b>K-Gly68 (10.0)</b> |     |                           | <b>K-Tyr91 (8.5)</b>  |     |                                           |
| Gly                   | VDW | Glu362                    | Tyr                   | VDW | Ser322                                    |
| <b>K-Tyr91 (13.5)</b> |     |                           |                       |     |                                           |
| Tyr                   | VDW | Ser322                    |                       |     |                                           |

## References

- [S1] Roeffen, W., Teelen, K., van As, J., vd Vegte-Bolmer, M., Eling, W., and Sauerwein, R. (2001). Plasmodium falciparum: production and characterization of rat monoclonal antibodies specific for the sexual-stage Pfs48/45 antigen. *Exp Parasitol* 97, 45-49. 10.1006/expr.2000.4586
